# Supplementary material for: Analysis of the adsorption state and desorption kinetics of NO2 over Fe–zeolite catalyst by FT-IR and temperature-programmed desorption
Source: Royal Society of Chemistry journal article supplement (doi:10.1039/b923938c), 2010-01-01
Supplement: b923938c.pdf [file b923938c.pdf]

Supplementary Material for PCCP

This journal is © The Owner Societies 2010

## Supplementary Information

Analysis of adsorption state and desorption kinetics of NO<sub>2</sub> over Fe-Zeolite catalyst by FT-IR and temperature-programmed desorption

*Masaoki Iwasaki\**, *Hirofumi Shinjoh*

Toyota Central R&D Laboratories, Inc., 41-1 Yokomichi, Nagakute, Aichi 480-1192, Japan

Corresponding Author e-mail: [iwasaki@mosk.tytlabs.co.jp](mailto:iwasaki@mosk.tytlabs.co.jp); Tel.: +81 561 71 7810; Fax: +81 561 63 6712.

**Figure. S1**

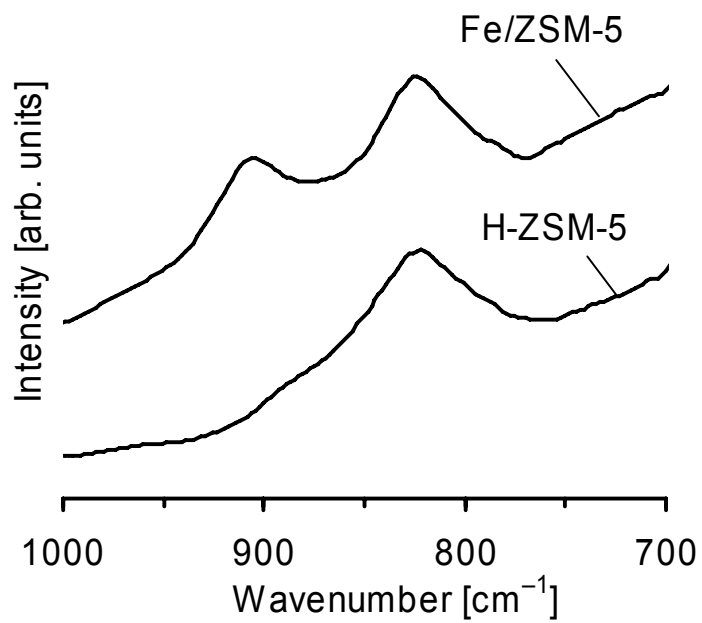

**Figure S1.** FT-IR spectra of Fe/ZSM-5 and H-ZSM-5 in the T-O-T vibration region.

Figure. S2

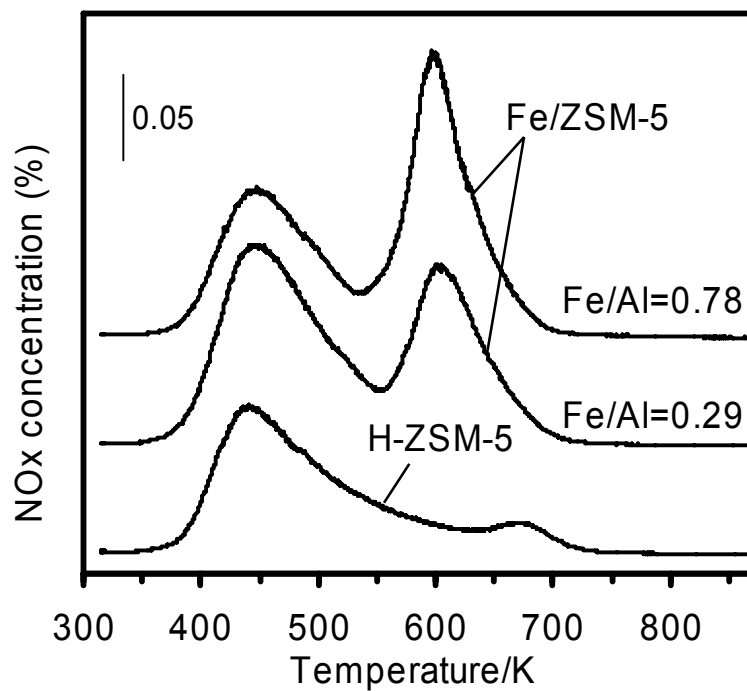

**Figure S2.** NO<sub>2</sub>-TPD spectra of Fe/ZSM-5 (Fe/Al = 0.78 and 0.29) and H-ZSM-5. Heating rate is 10 K/min and flow rate is 100 ml/min.
